# Supplementary material
Source: HighWire-hosted journal article supplement (https://jnm.snmjournals.org/highwire/filestream/94119/field_highwire_adjunct_files/0/071233_suppl_figs.pdf)
Supplement: 071233_suppl_figs.pdf [file 071233_suppl_figs.pdf]

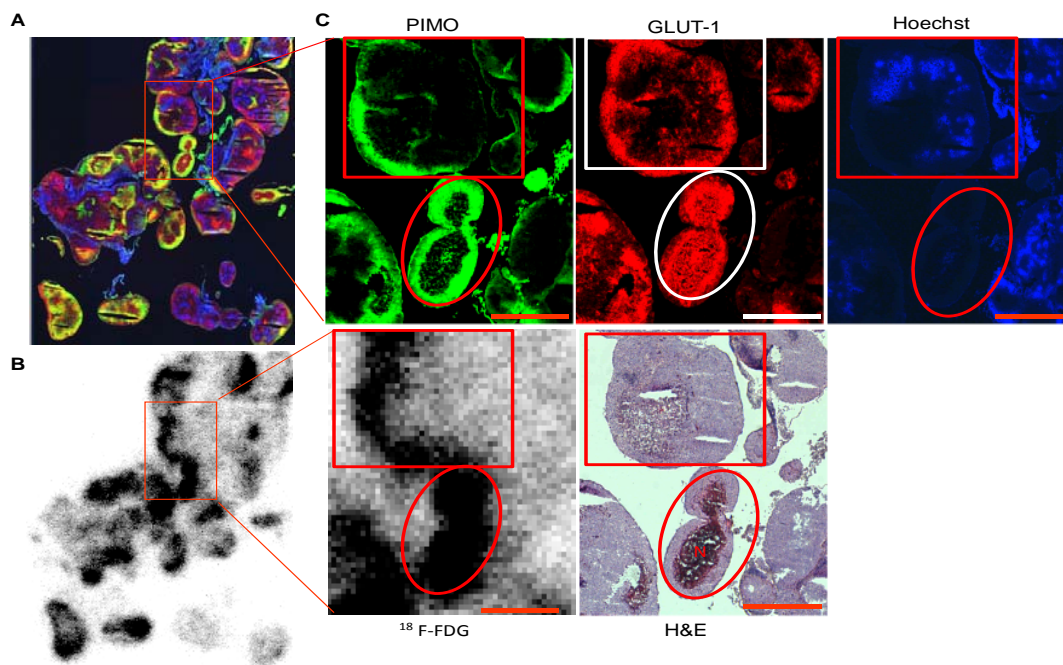

**Supplemental Figure 1** (A) Relationship between  $^{18}\text{F}$ -FDG uptake, pimonidazole binding, GLUT-1 expression and blood perfusion in disseminated peritoneal HCT-8 tumors from an animal breathing air. (A) Merged fluorescence image of pimonidazole (PIMO, green), GLUT-1 (red) and Hoechst 33342 (blue) from a tumor tissue section containing tumors ranging from several hundred micrometers to several millimeters in diameter. (B)  $^{18}\text{F}$ -FDG autoradiogram of the same section. (C) Enlarged images of the region of interest indicated in A&B. The larger tumor (square) has centrally low  $^{18}\text{F}$ -FDG uptake, pimonidazole binding and GLUT-1 expression with significant blood perfusion. In contrast, the microscopic tumors (circle) have high  $^{18}\text{F}$ -FDG uptake, pimonidazole binding and GLUT-1 expression in viable cells with little perfusion. H&E image provided for reference. All images were obtained from the same section. Similar results were seen in 2 air-breathing animals. Scale bar 1 mm. N= necrosis.

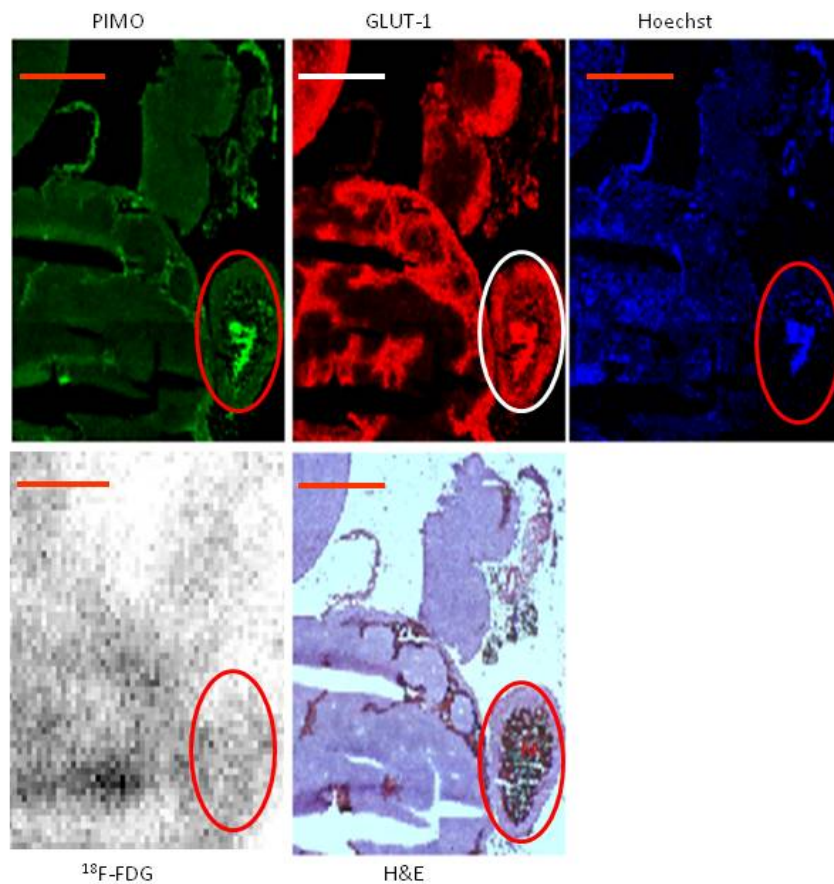

**Supplemental Figure 2** Relationship between  $^{18}\text{F}$ -FDG uptake, pimonidazole binding, GLUT-1 expression and blood perfusion in disseminated peritoneal HCT-8 tumors from a carbogen-breathing animal.  $^{18}\text{F}$ -FDG uptake and pimonidazole binding were lower than in air-breathing conditions (see Suppl. Fig. 1) although GLUT-1 expression was similar. All images were obtained from the same section. Similar results were seen in 2 carbogen-breathing animals Scale bar 1 mm. N= necrosis.

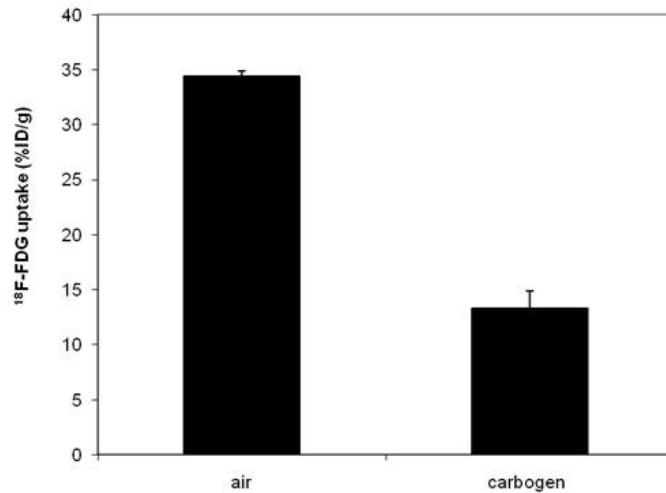

**Supplemental Figure 3** The differences in <sup>18</sup>F-FDG uptake between sub-millimeter HCT-8 tumors in air and carbogen breathing animals were significant (number of tumors: 3-6), Quantitative <sup>18</sup>F-FDG uptake based on a collection of intraperitoneal HCT-8 tumors of sub-millimeter diameter derived from a single air-breathing animal (3 tumors) and a single carbogen-breathing animal (6 tumors). <sup>18</sup>F-FDG uptake was significantly reduced for carbogen-breathing,  $P < 0.001$ .
